# Supplementary material for: Functional analysis of isoprenoid precursors biosynthesis by quantitative metabolomics and isotopologue profiling
Source: PubMed Central journal article supplement (PMC6704079; doi:10.1007/s11306-019-1580-8), 2019-08-21

## Supporting information

### **Functional analysis of isoprenoid precursors biosynthesis in yeast by quantitative metabolomics and isotopologue profiling**

Sara Castano-Cerezo<sup>§,1</sup>, Hanna Kulyk-Barbier<sup>§,1</sup>, Pierre Millard<sup>§,1</sup>, Jean-Charles Portais<sup>1,2</sup>,  
Stéphanie Heux<sup>1</sup>, Gilles Truan<sup>1</sup>, Floriant Bellvert<sup>1,2,\*</sup>

<sup>1</sup>LISBP, Université de Toulouse, CNRS, INRA, INSA, Toulouse, France

<sup>2</sup>MetaToul-MetaboHUB, National infrastructure of metabolomics and fluxomics, Toulouse, France

§co-first authors

\*corresponding author: [floriant.bellvert@insa-toulouse.fr](mailto:floriant.bellvert@insa-toulouse.fr)

## Table of contents

**Table S-1.** Comparison of available methods for quantification of isoprenoids precursors.

**Table S-2.** Strains used this study.

**Figure S-1.** Optimization of the extraction procedure.

**Figure S-2.** Determination of optimal incubation time for extraction of isoprenoids precursors.

**Figure S-3.** Dynamic  $^{13}\text{C}$ -incorporation through the isoprenoid biosynthetic pathway.

**Table S-1. Comparison of available methods for quantification of isoprenoids precursors.** Limit of detection for all the isoprenoids precursors are provided in pmol of metabolite injected. *na*: not available. \*compounds co-elute and cannot be separated.

| DOI                           | Derivatization | Detection     | Sample                          | Run (min) | Limit of detection (pmol injected) |      |      |      |           |           |           |           |
|-------------------------------|----------------|---------------|---------------------------------|-----------|------------------------------------|------|------|------|-----------|-----------|-----------|-----------|
|                               |                |               |                                 |           | MEV                                | M5P  | M5PP | IPP  | DMAPP     | GPP       | FPP       | GGPP      |
| 10.1016/j.ab.2008.04.021      | Yes            | Fluorescence  | Mouse tissue                    | 21        | -                                  | -    | -    | -    | -         | -         | 0.1       | 0.1       |
| 10.1016/j.ab.2008.08.023      | No             | MS (MRM mode) | HepG2                           | 12        | 0.01                               | 0.01 | 0.01 | 1*   | 0.3*      | 0.3       | 0.3       | 0.6       |
| 10.1371/journal.pone.0049004  | No             | MS            | <i>Saccharomyces pombe</i>      | 16        | -                                  | -    | -    | -    | -         | -         | 0.5       | 0.5       |
| 10.1104/pp.16.01392           | No             | MS            | <i>Arabidopsis thaliana</i>     | 30        | -                                  | -    | -    | -    | -         | <i>na</i> | <i>na</i> | <i>na</i> |
| 10.1007/s00216-017-0293-y     | No             | MS (MRM mode) | Human plasma                    | 15        | -                                  | -    | -    | -    | -         | -         | 0.5       | <i>na</i> |
| 10.1016/j.chroma.2017.01.084  | No             | MS (SIM mode) | Blood serum                     | 11        | -                                  | -    | -    | -    | -         | -         | 0.1       | 3         |
| 10.3390/ijms11103965          | No             | MS (MRM mode) | Mouse brain                     | 16        | -                                  | -    | -    | -    | -         | -         | -         | <i>na</i> |
| 10.1007/s00216-008-2306-3     | Yes            | Fluorescence  | Human brain tissue              | 20        | -                                  | -    | -    | -    | -         | -         | <i>na</i> | <i>na</i> |
| 10.1016/j.jchromb.2009.07.010 | No             | MS            | Human breast cancer cells       | 13        | -                                  | -    | -    | 1.3* | 1.3*      | -         | -         | -         |
| 10.1093/femsyr/fox032         | No             | MS            | <i>Saccharomyces cerevisiae</i> | 15        | -                                  | -    | -    | -    | <i>na</i> | <i>na</i> | 0.01      | -         |
| 10.1016/j.ab.2011.12.037      | No             | MS (MRM mode) | <i>Arabidopsis thaliana</i>     | 22        | -                                  | -    | -    | -    | -         | 0.9       | 1.1       | 1.9       |
| 10.1016/j.chroma.2018.05.006  | No             | MS (MRM mode) | Natural rubber latex            | 12        | -                                  | -    | -    | -    | 0.1       | -         | 0.04      | -         |
| 10.1074/jbc.M109.083931       | No             | MS (MRM mode) | Mammalian cells                 | 10        | -                                  | -    | -    | -    | -         | <i>na</i> | <i>na</i> | <i>na</i> |
| 10.1007/s11745-009-3355-x     | Yes            | Fluorescence  | Mammalian cells                 | 28        | -                                  | -    | -    | -    | -         | 0.02      | -         | -         |
| 10.1006/abio.1997.2314        | Yes            | Fluorescence  | Dog and human plasma            | 20        | -                                  | -    | -    | -    | -         | -         | 0.01      | -         |

**Table S-2. Strains used this study.**

| <b>Strain</b>    | <b>Genotype</b>                                                                                                                                                                                           | <b>Plasmid</b>                                                    |
|------------------|-----------------------------------------------------------------------------------------------------------------------------------------------------------------------------------------------------------|-------------------------------------------------------------------|
| <b>Wild type</b> | CEN.PK2-1 MATa; his3D1; leu2-3_112; ura3-52; trp1-289; MAL2-8c; SUC2                                                                                                                                      | pFL36 (LEU2)                                                      |
| <b>S023</b>      | CEN.PK2-1 MATa; his3D1; leu2-3_112; ura3-52; trp1-289; MAL2-8c; SUC2<br>bts1::ADH1t-HMG1t-TDH3-PGKp-ERG20-ADH2t-URA3,<br>X-2::PDC1p- <i>CrtB</i> <sup><i>P. ananatis</i></sup> -CYC1t-TRP1,<br>X-4:: HIS3 | pENZ017<br>TEF1p-CrtE <sup><i>X.dendrorus</i></sup> -ADH1t (LEU2) |
| <b>S037</b>      | CEN.PK2-1 MATa; his3D1; leu2-3_112; ura3-52; trp1-289; MAL2-8c; SUC2<br>bts1Δ::ADH1t-HMG1t-TDH3-PGKp-ERG20-ADH2t-URA3,<br>x-2:: TRP1,<br>x-4:: HIS3                                                       | pENZ017<br>TEF1p-CrtE <sup><i>X.dendrorus</i></sup> -ADH1t (LEU2) |

**Figure S-1. Optimization of the extraction procedure.** Samples (10 mL) were collected from a unique cultivation by fast filtration, extracted using different procedures, and analyzed by LC-HRMS. The extraction solution providing the most intense and reproducible signals was isopropanol/H<sub>2</sub>O + 100mM NH<sub>4</sub>CO<sub>3</sub> (1:1).

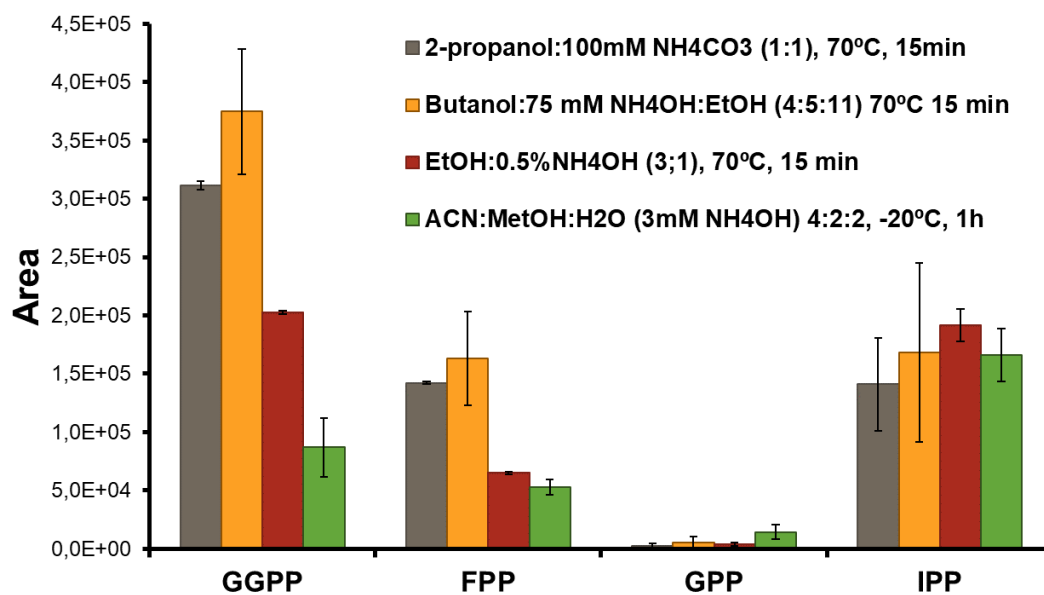

**Figure S-2. Determination of optimal incubation time for extraction of isoprenoids precursors.**

Samples (10 mL) were collected from a unique cultivation by fast filtration, incubated in the extraction solution (isopropanol/H<sub>2</sub>O + 100mM NH<sub>4</sub>HCO<sub>3</sub>, 1:1) at 70°C for 2, 5, 10, 15, 20 or 30 minutes, and cooled on ice before adding the U-<sup>13</sup>C-internal standard. The concentration of all compounds were stable for all extraction times, indicating no significant degradation occurred in our conditions.

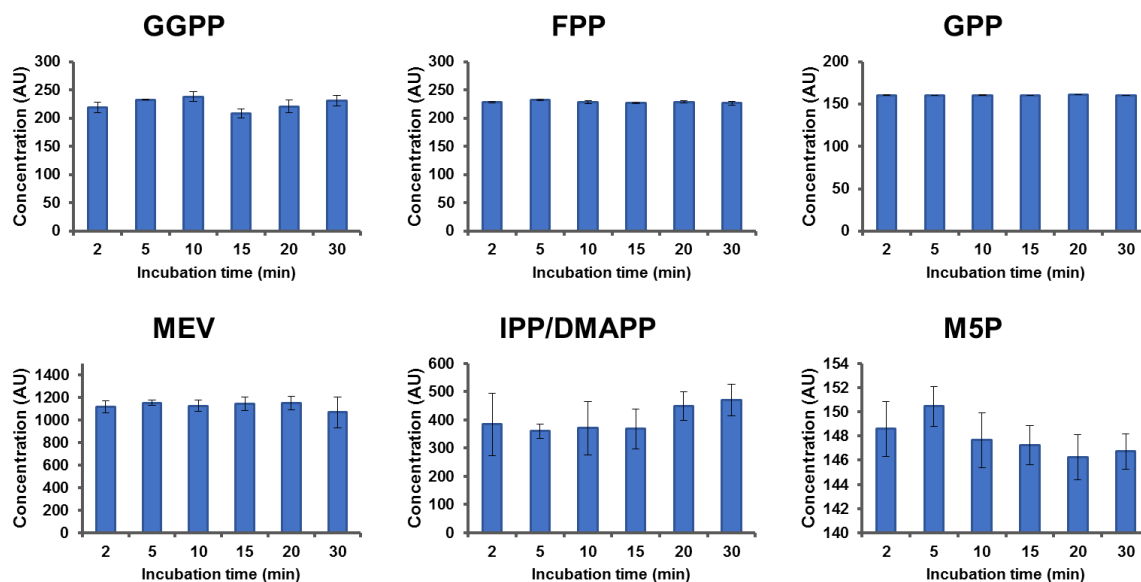

**Figure S-3. Dynamic  $^{13}\text{C}$ -incorporation through the isoprenoid precursors pathway.** Isotopologue distributions of the mevalonates and prenylpyrophosphates intermediates were measured during 120 min following a switch from unlabeled to U- $^{13}\text{C}$ -glucose in strains WT, S037 and S023.

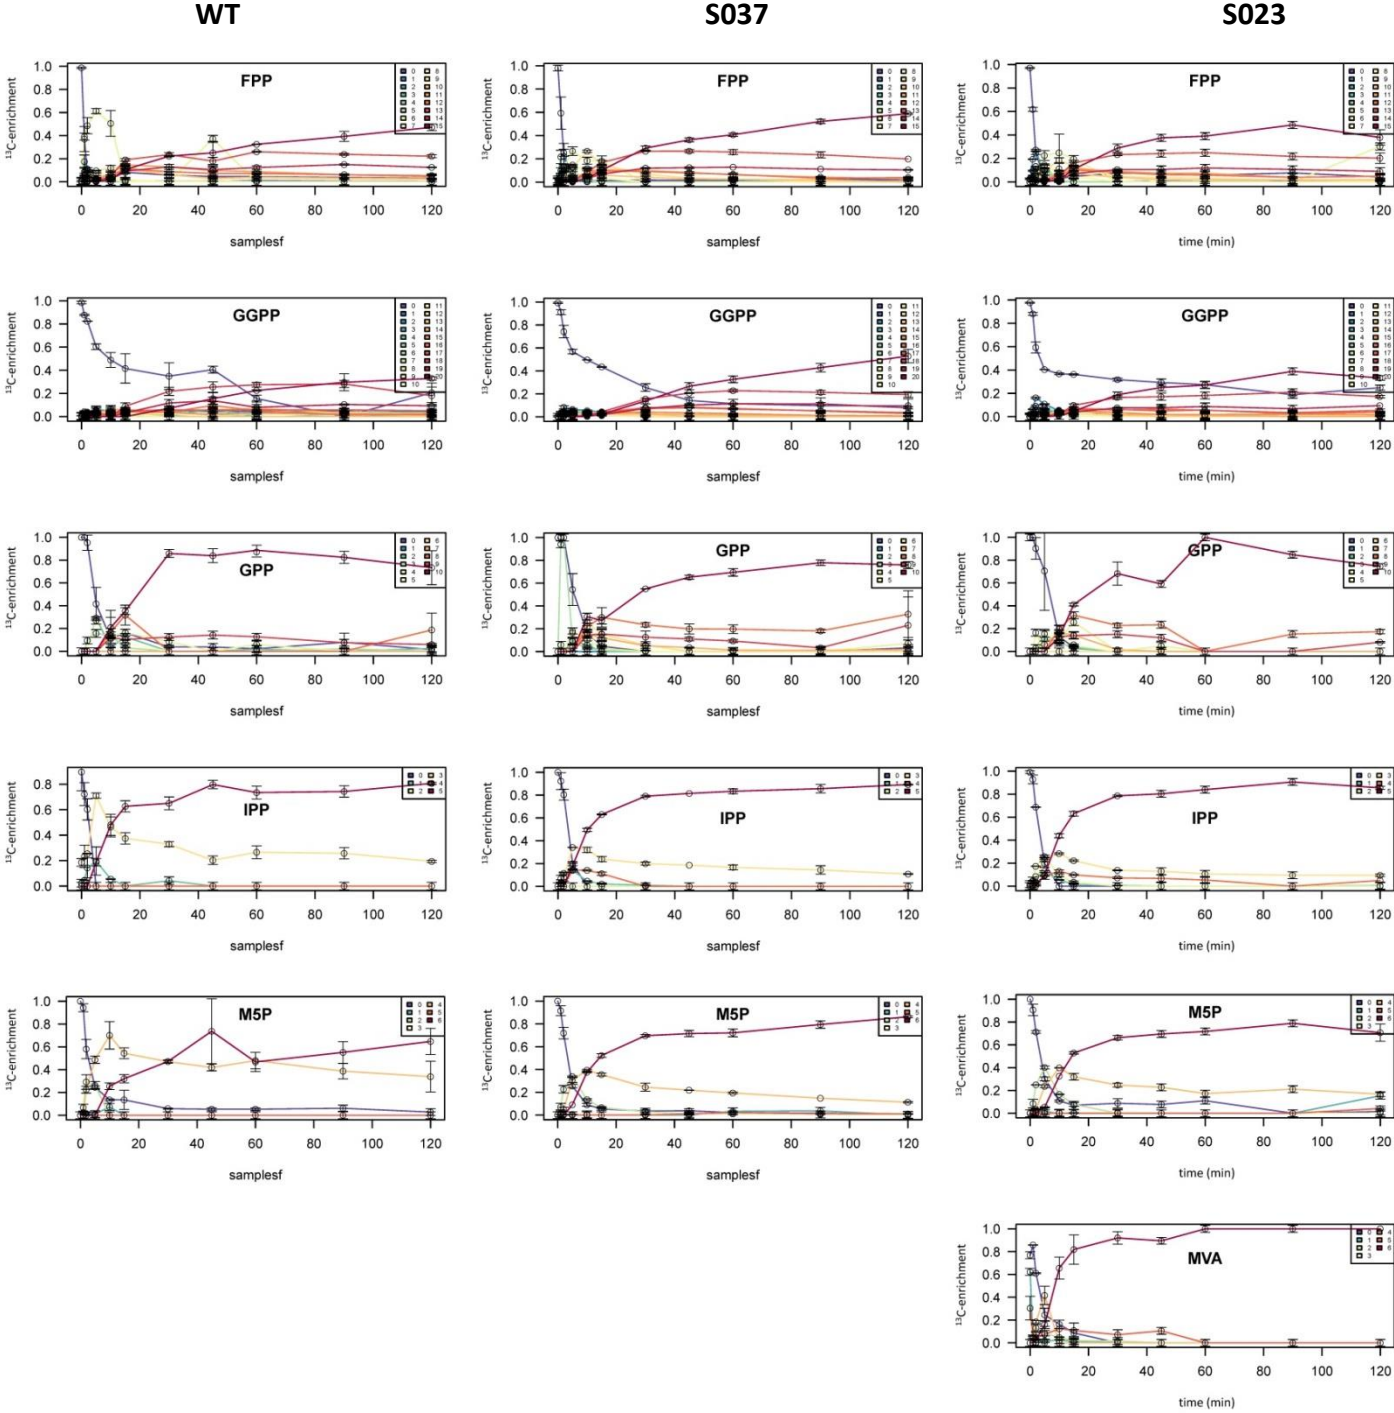

Supplement: 11306_2019_1580_MOESM1_ESM.pdf [file 11306_2019_1580_MOESM1_ESM.pdf]
